# Supplementary material for: Hard carbon spheres prepared by a modified Stöber method as anode material for high-performance potassium-ion batteries
Source: Royal Society of Chemistry journal article supplement (doi:10.1039/d1ra01488a), 2021-01-01
Supplement: d1ra01488a1.pdf [file d1ra01488a1.pdf]

## Supplementary Information

### Hard carbon spheres as anode material for high-performance potassium-ion battery

Chenyang Fan<sup>‡</sup>, Mingyang Ou<sup>‡</sup>, Peng Wei, Jia Xu, Shixiong Sun, Yi Liu, Yue Xu, Chun Fang, Qing Li and Jiantao Han\*

State Key Laboratory of Material Processing and Die & Mould Technology

School of Materials Science and Engineering

Huazhong University of Science and Technology

Wuhan 430074, P. R. China

#### Corresponding Author

\*E-mail: [jthan@hust.edu.cn](mailto:jthan@hust.edu.cn) (Prof. Jiantao Han)

<sup>‡</sup> C. Fan and M. Ou contributed equally to this work.

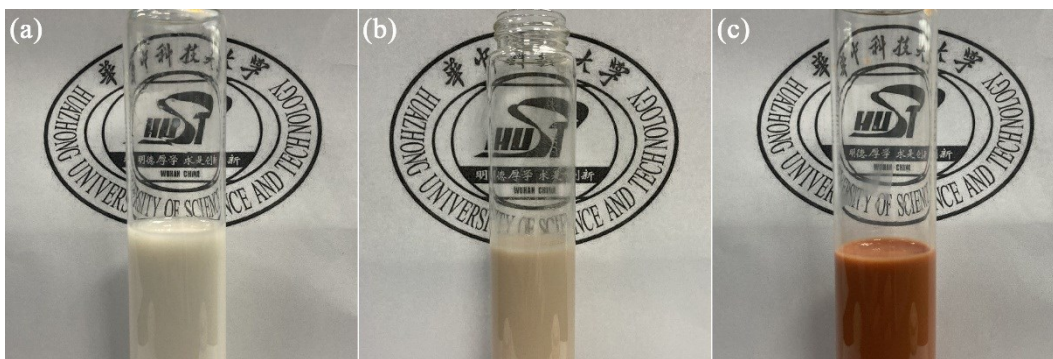

**Fig. S1** The products at different stages of the Stober synthesis process at room temperature, (a) after adding the reaction materials, (b) after 12 h stirring, and (c) after 24 h hydrothermal reaction.

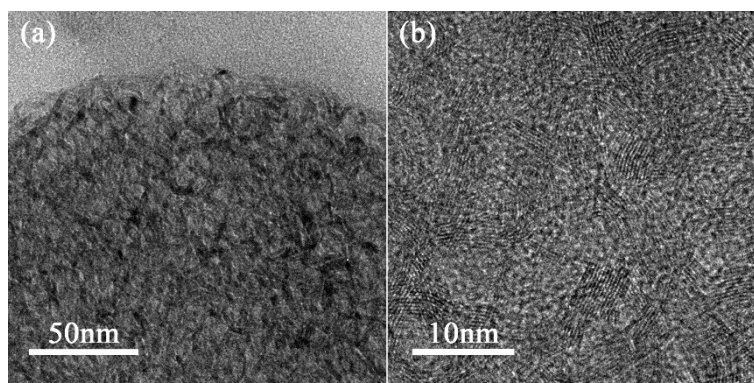

**Fig. S2** The TEM images of (a, b) HSGC after embedding frozen sections.

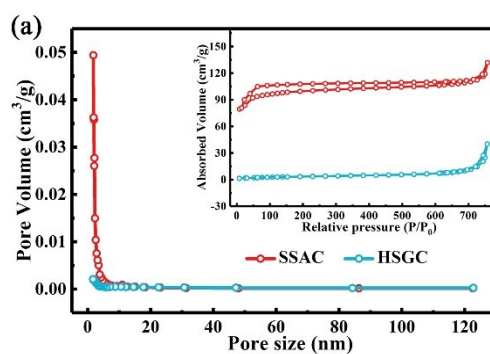

**Fig. S3.** (a) Nitrogen adsorption–desorption isotherm curves and pore size distribution of SSAC and HSGC.

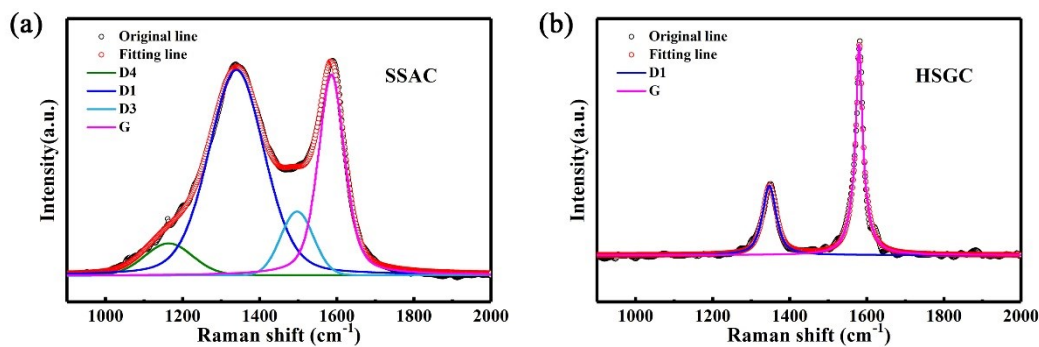

**Fig. S4.** (a, b) Fitted Raman spectra curves of SSAC and HSGC.

**Table. S1** Elemental analysis results of SSAC and HSGC.

|      | C(%)   | H(%)  | O(%)   | N(%) |
|------|--------|-------|--------|------|
| SSAC | 84.132 | 1.594 | 11.709 | 2.61 |
| HSGC | 98.092 | 0.152 | 0.806  | 0.95 |

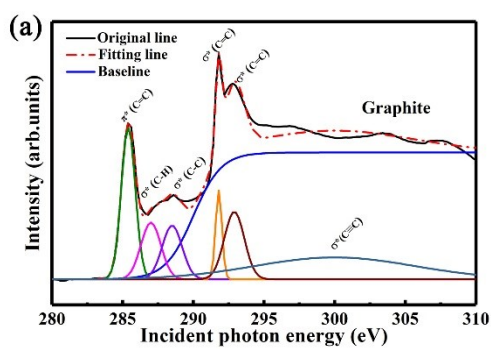

**Fig. S5.** (a) Fitted XANES curves of graphite. The graphite was purchased from BTR New Material Group Co., Ltd.

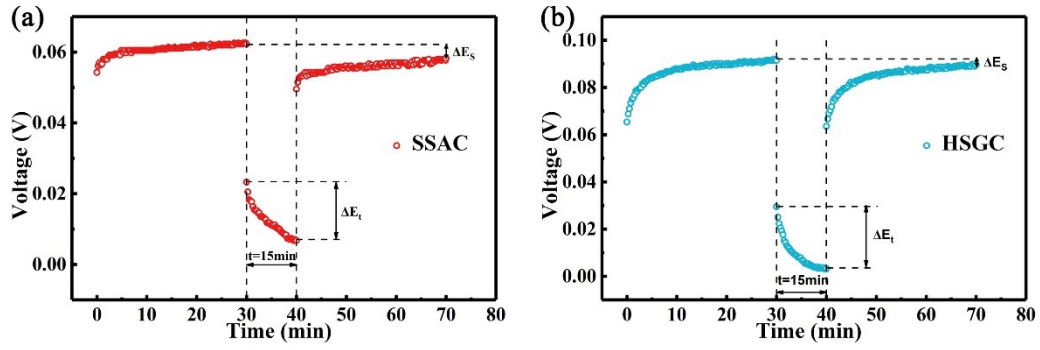

**Fig. S6.** (a, b) Time vs Voltage profiles for a single GITT titration of SSAC and HSGC.

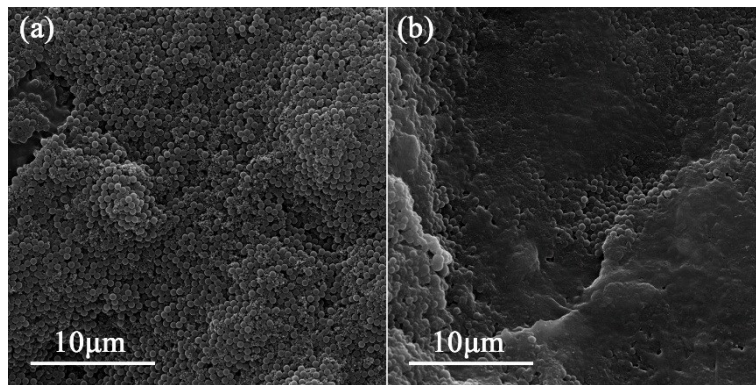

**Fig. S7.** The SEM images of (a, b) SSAC electrode before and after 90 cycles.

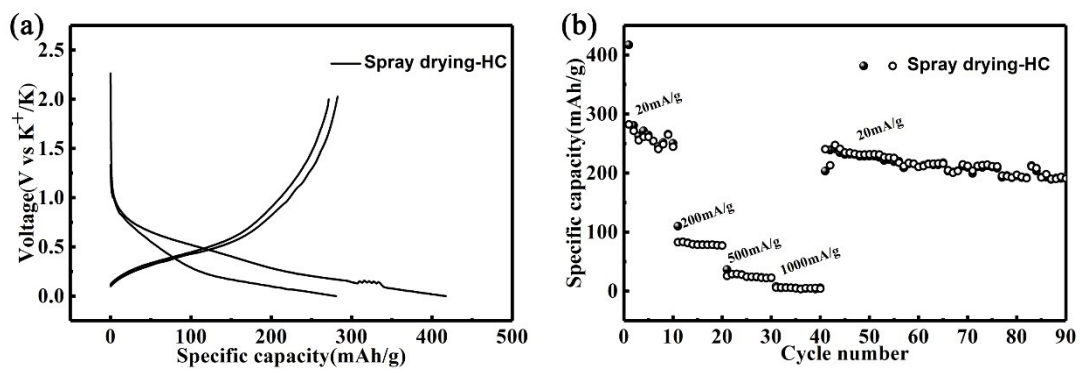

**Fig. S8.** (a) Discharge and charge curves of the first two cycles of Spray drying-HC electrodes at 20 mA/g. (b) Rate performance of Spray drying-HC electrodes at different rates, followed by cycling performance.

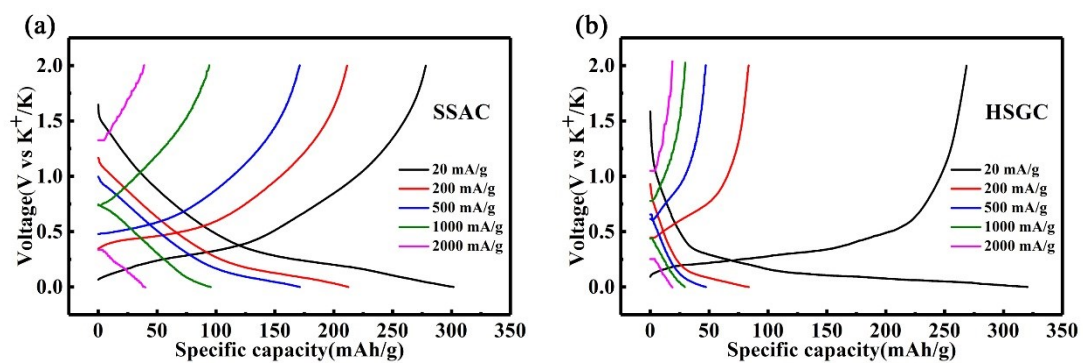

**Fig. S9.** (a, b) Discharge and charge curves of SSAC and HSGC at different current densities.
